# Supplementary material
Source: publisher site journal article supplement (https://www.spandidos-publications.com/7649/downloadSupplementary)

Figure S1. Immunohistochemistry analysis of STOML1 protein expression in nasopharyngeal carcinoma tissue. (A) Overview. (B) High and (C) low protein expression levels of STOML1. STOML1, stomatin like 1.

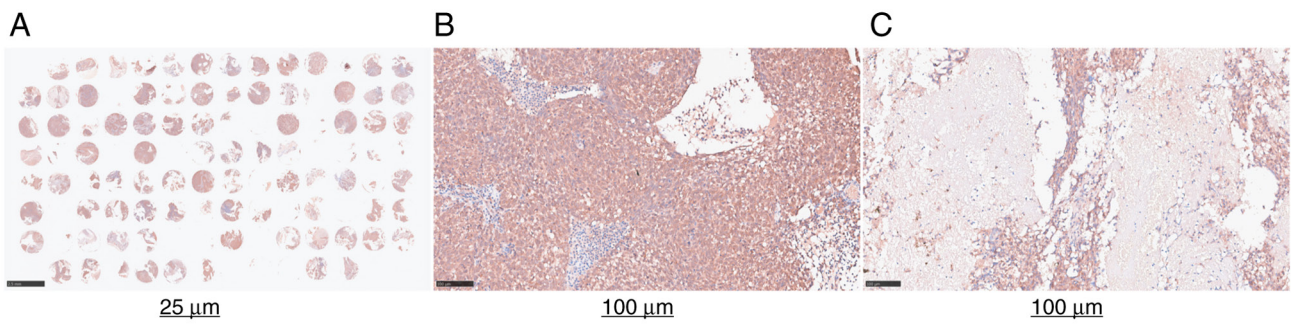

Figure S2. Immunohistochemistry analysis of U2SURP protein expression in nasopharyngeal carcinoma tissue. (A) Overview. (B) High and (C) low protein expression levels of U2SURP. U2SURP, U2 snRNP associated SURP domain containing.

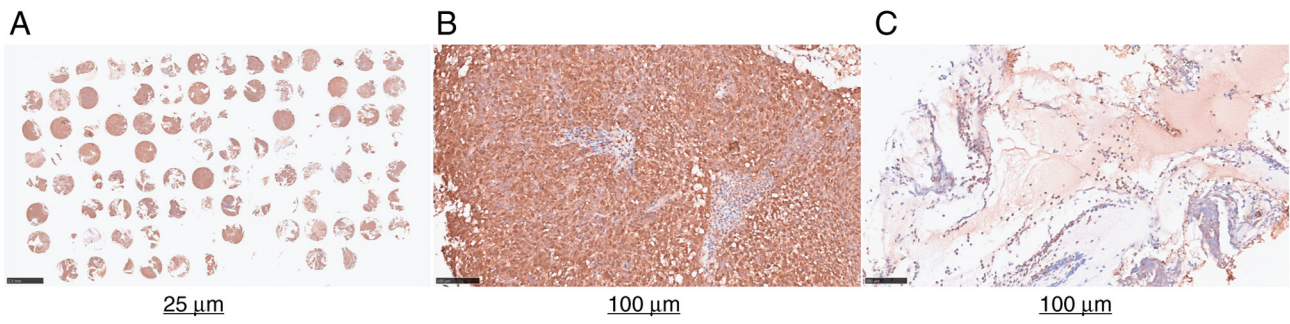

Figure S3. Immunohistochemistry analysis of RINT1 protein expression in nasopharyngeal carcinoma tissue. (A) Overview. (B) High and (C) low protein expression levels of RINT1. RINT1, RAD50-interacting protein 1.

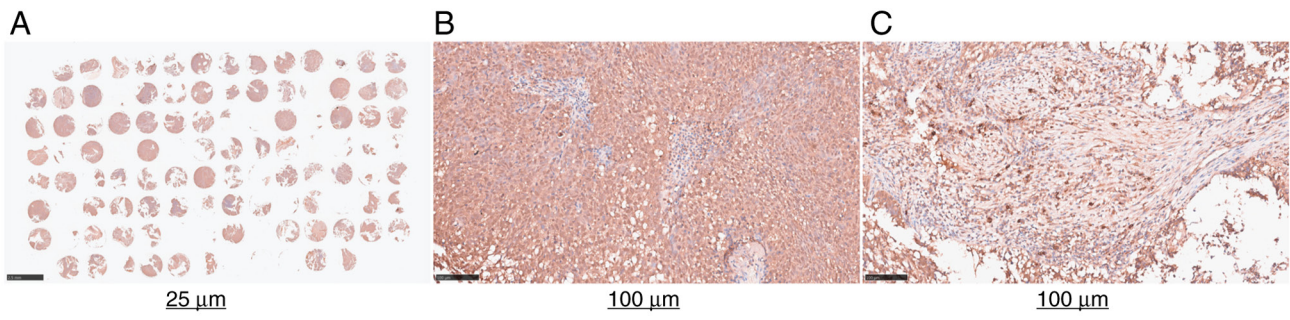

Figure S4. Immunohistochemistry analysis of RAB25 protein expression in nasopharyngeal carcinoma tissue. (A) Overview. (B) High and (C) low protein expression levels of RAB25. RAB25, Ras-related protein 25.

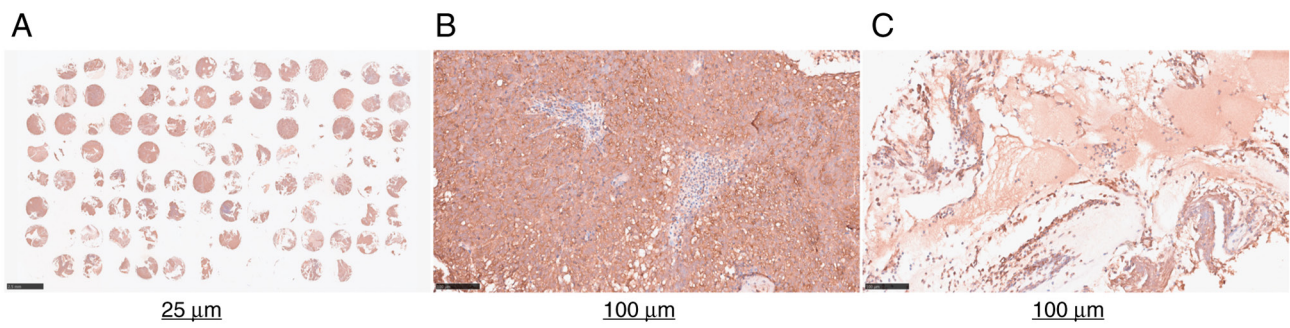

Figure S5. Immunohistochemistry analysis of BASP1 protein expression in nasopharyngeal carcinoma tissue. (A) Overview. (B) High and (C) low protein expression levels of BASP1. BASP1, brain acid soluble protein 1.

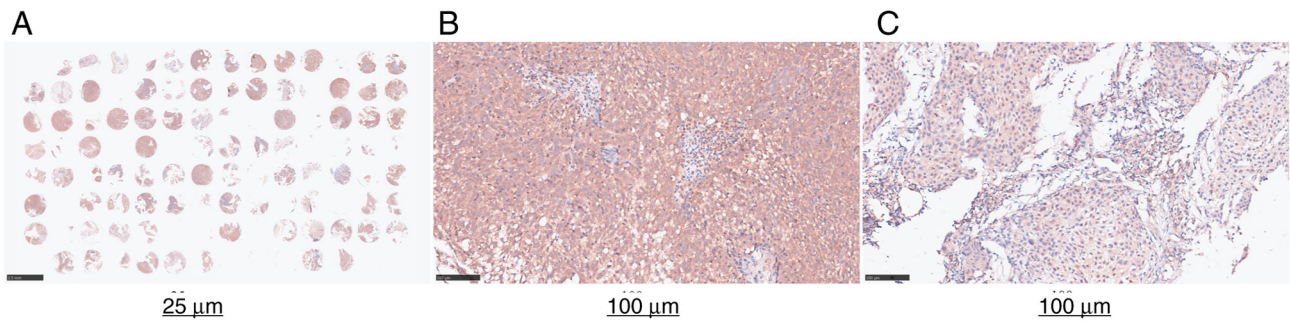

Supplement: Supplementary file 1 [file downloadSupplementary]
